# Supplementary material for: Establishment of the Myeloid TBX-Code Reveals Aberrant Expression of T-Box Gene TBX1 in Chronic Myeloid Leukemia
Source: MDPI journal article supplement (doi:10.3390/ijms25010032), 2023-12-19
Supplement: s1 [file s1]

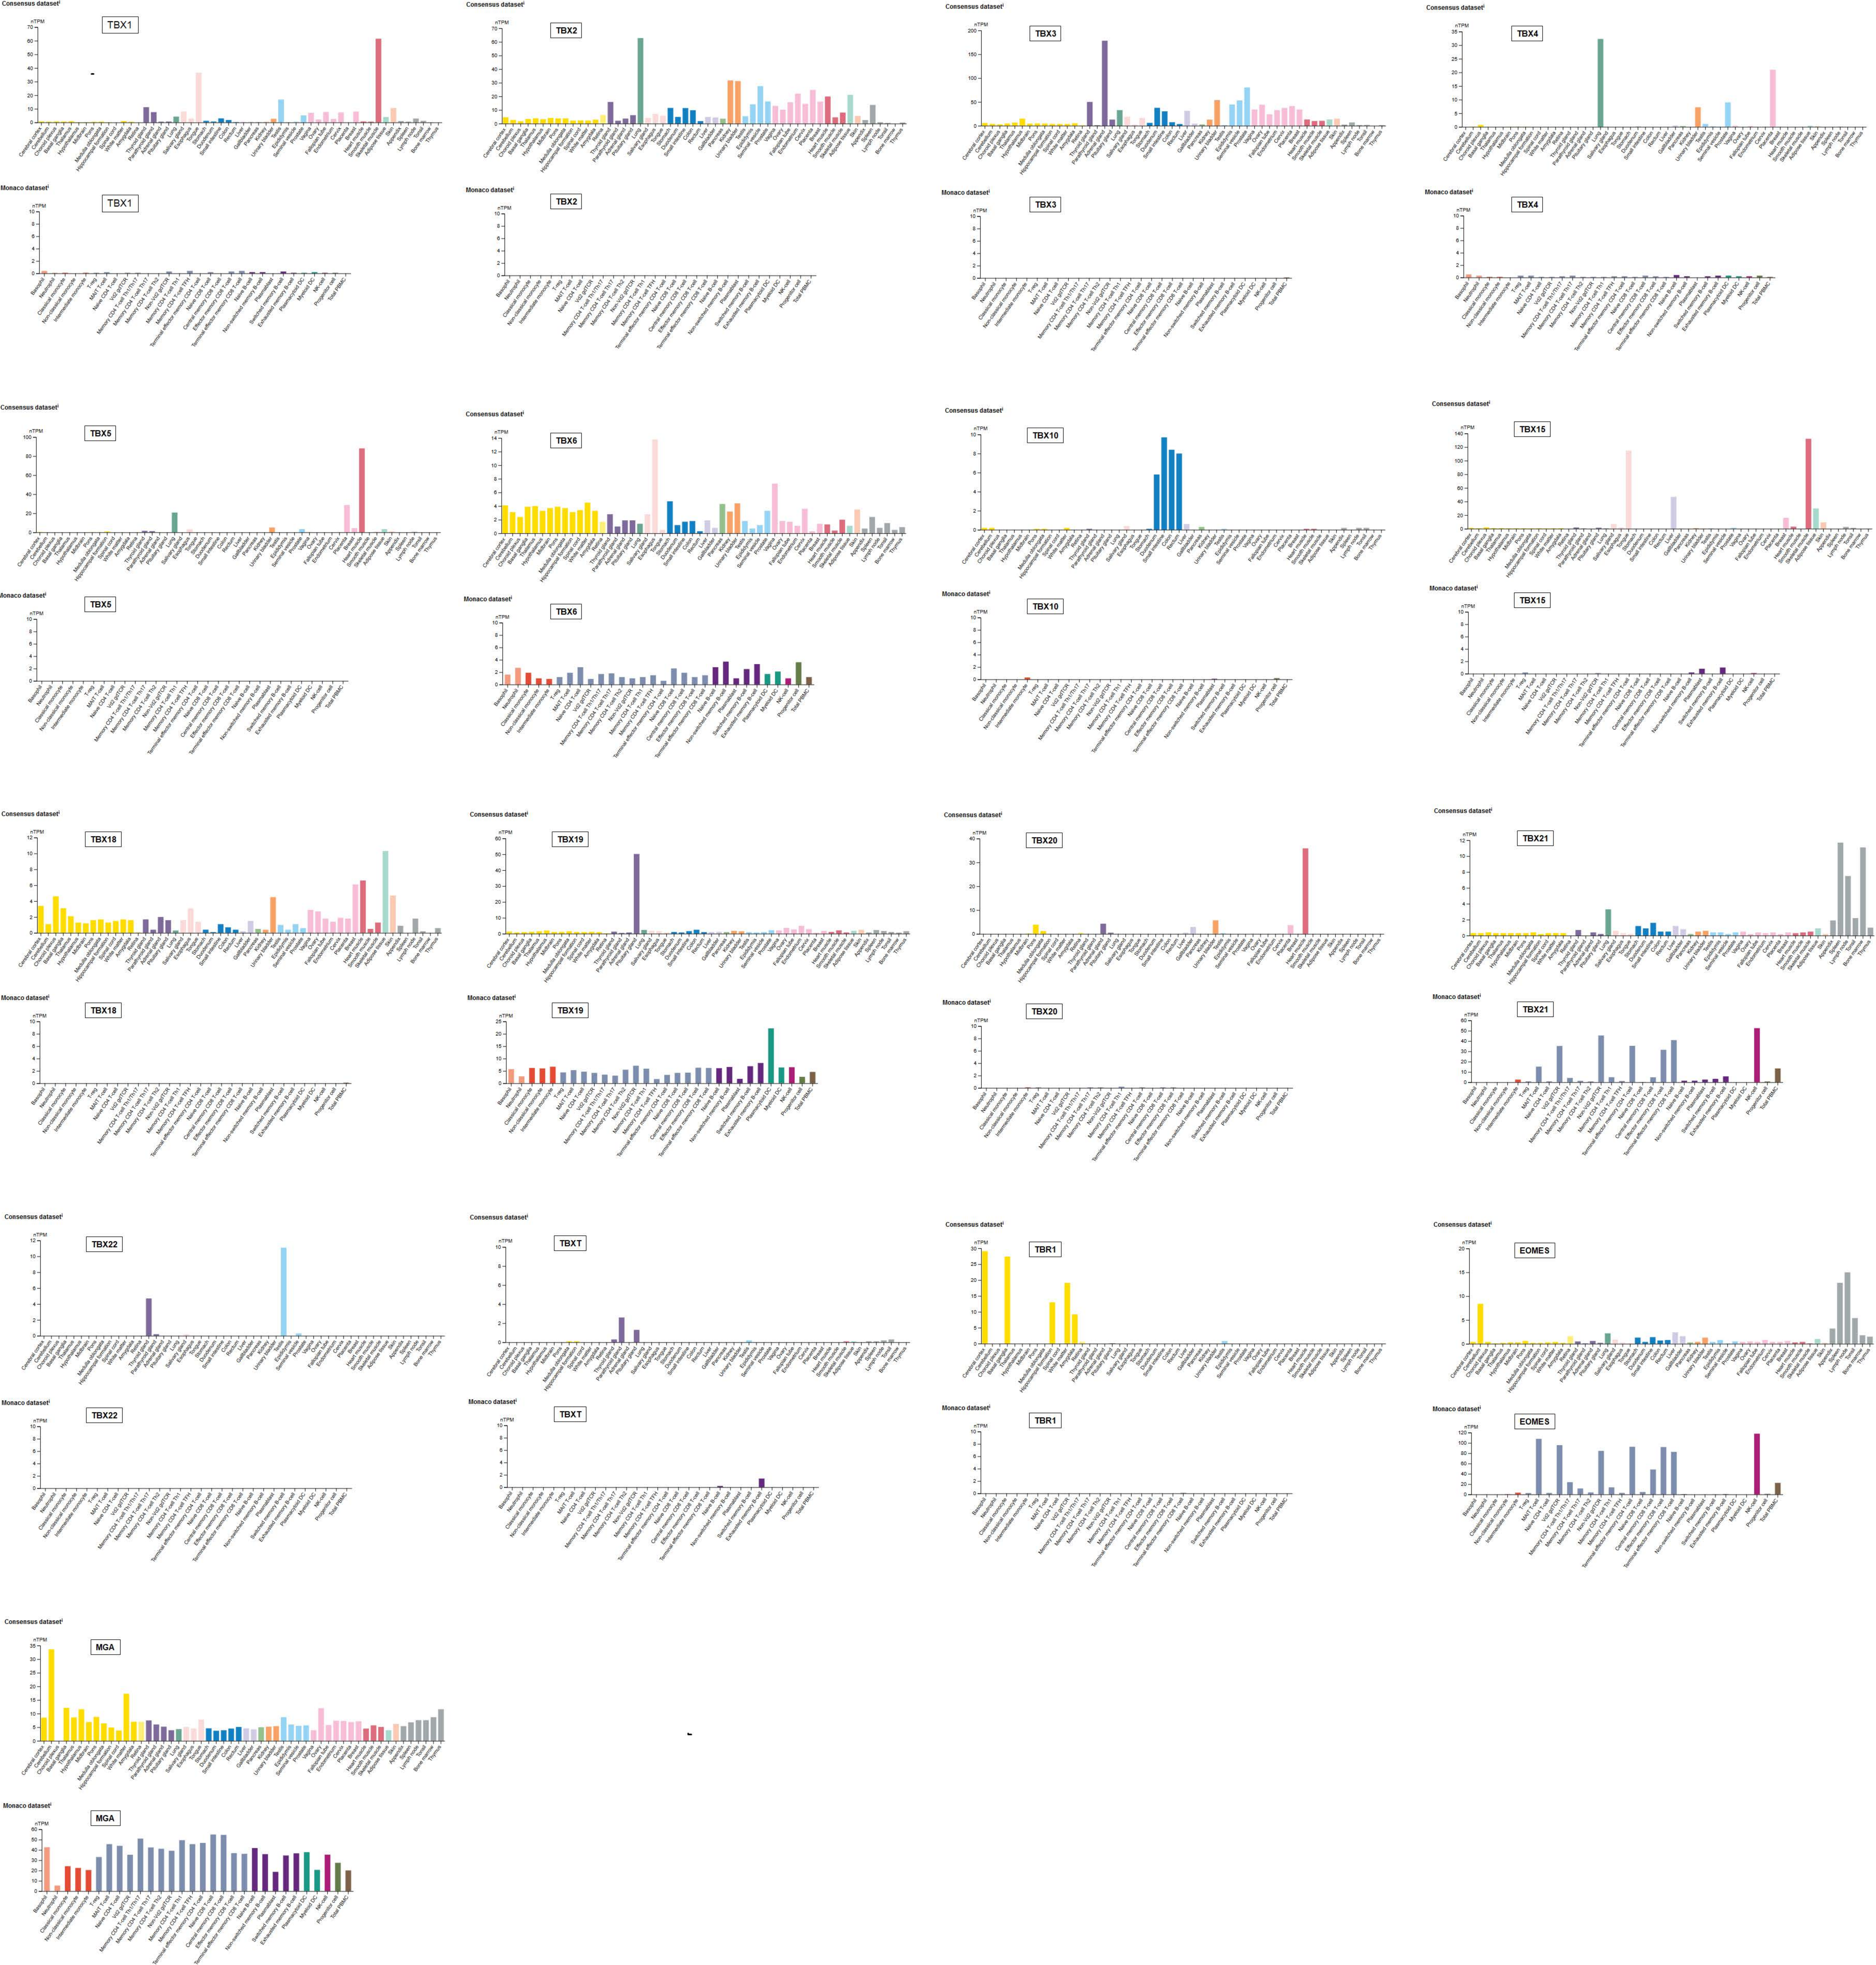



# Myelopoiesis GSE42519

Cutoff: 4.5

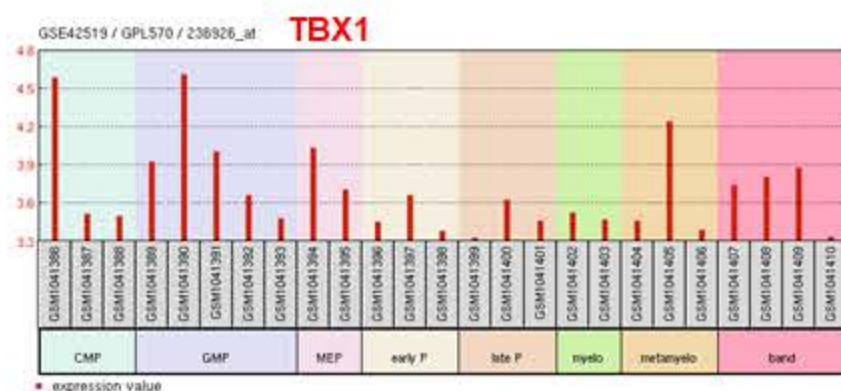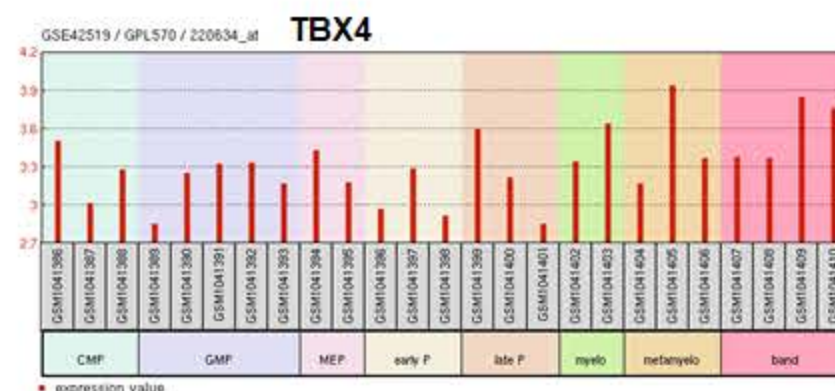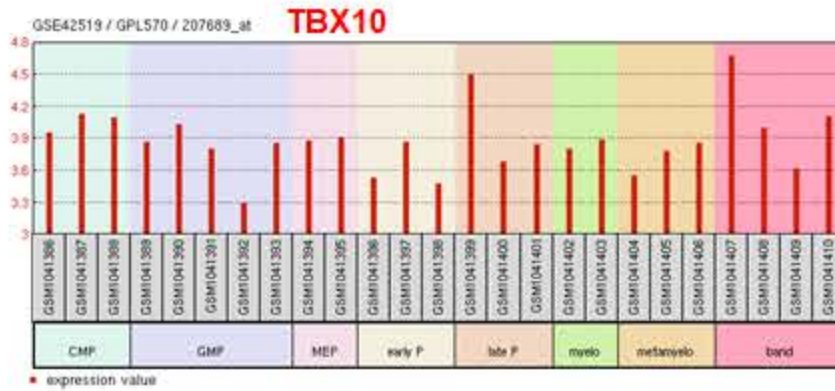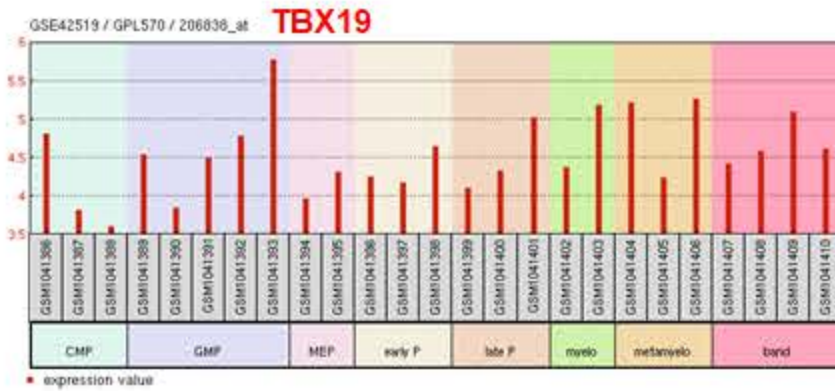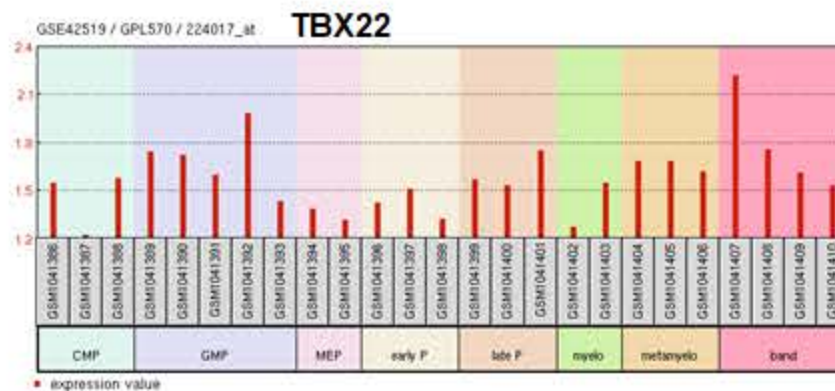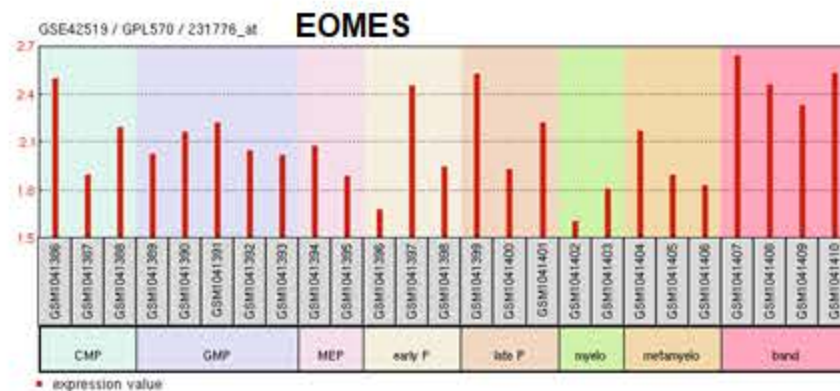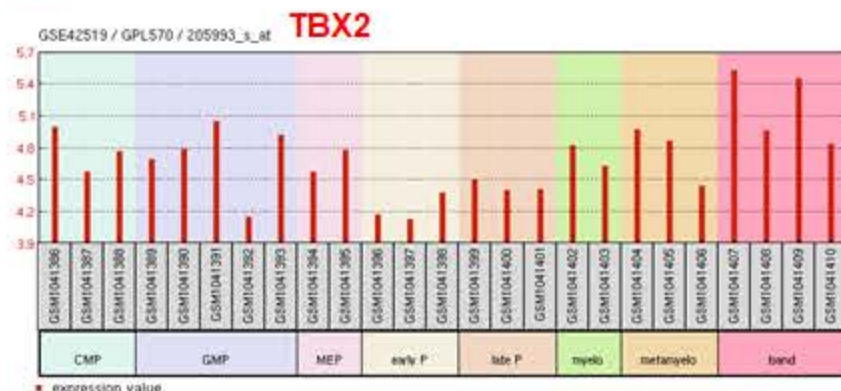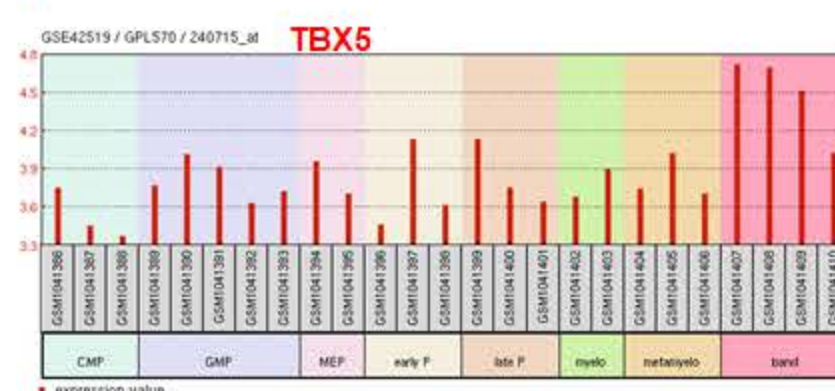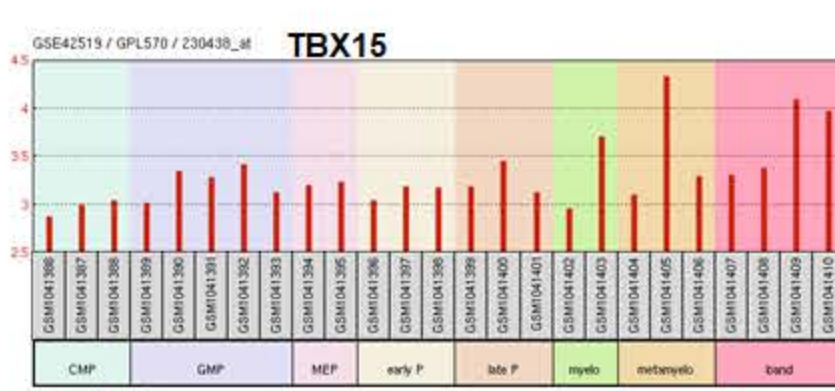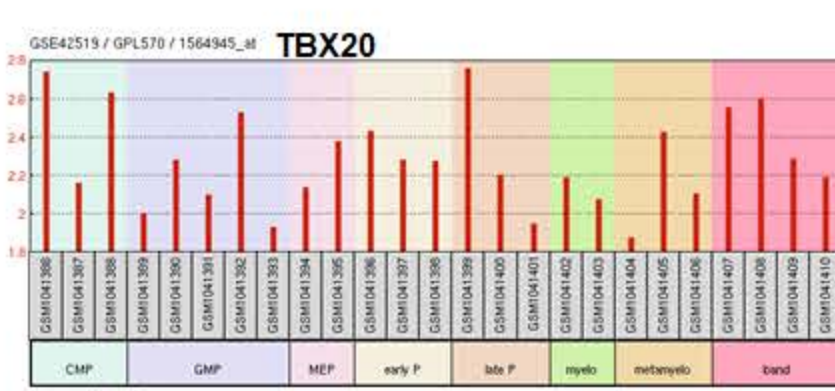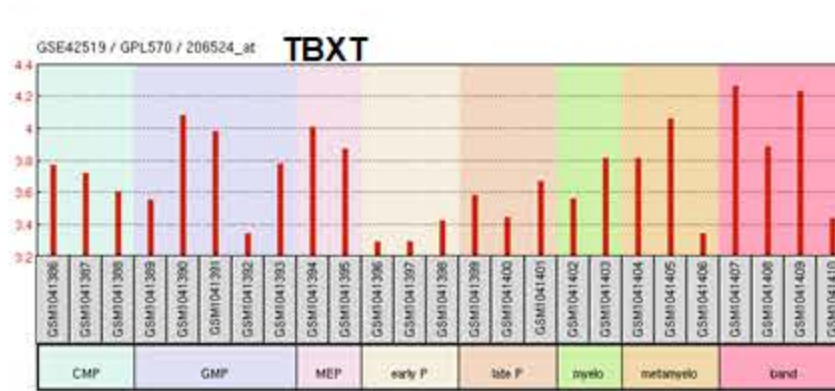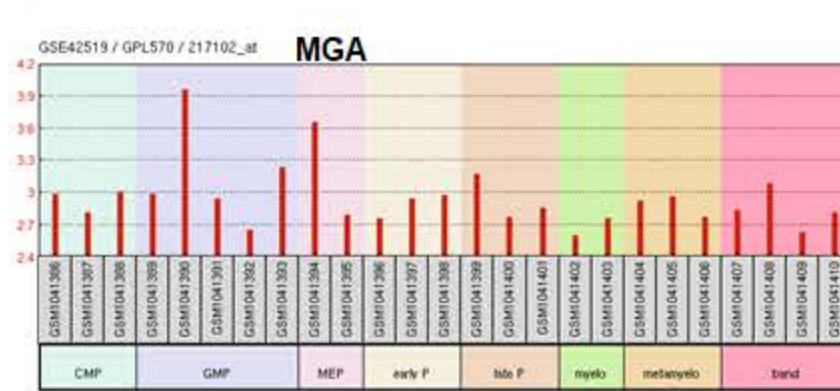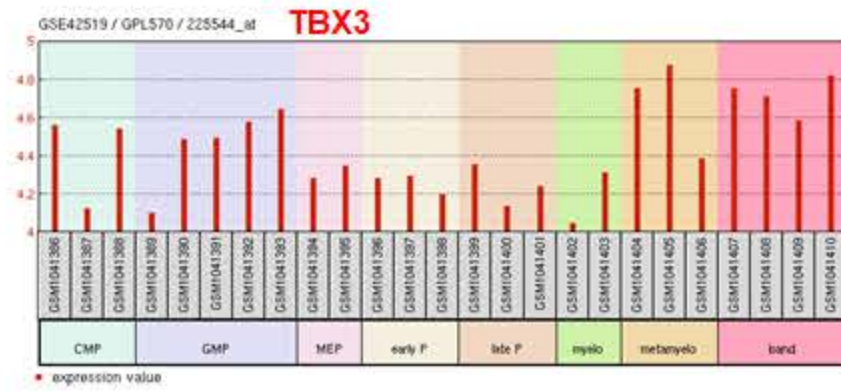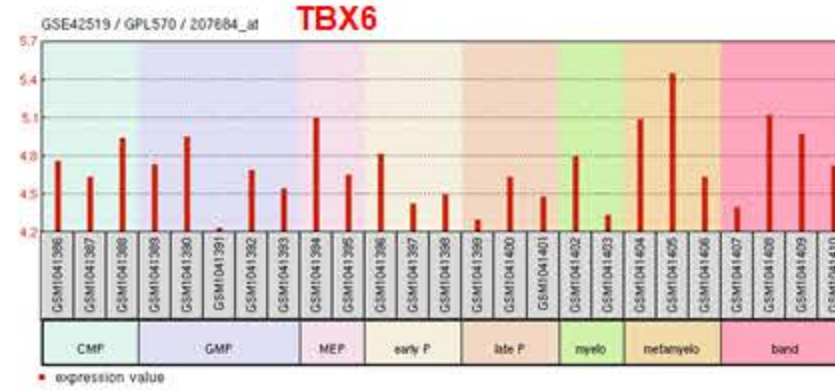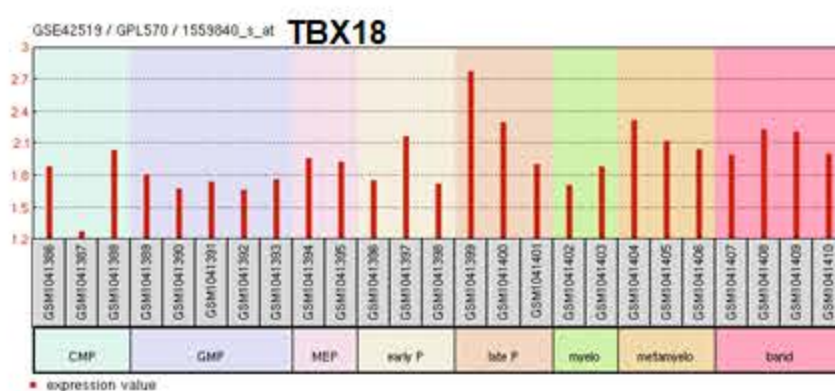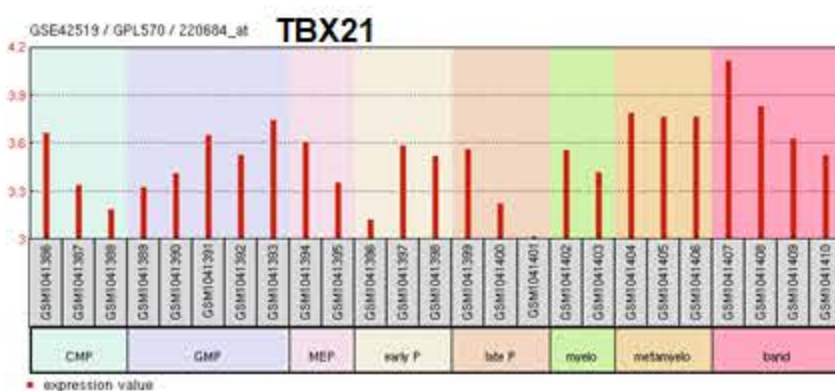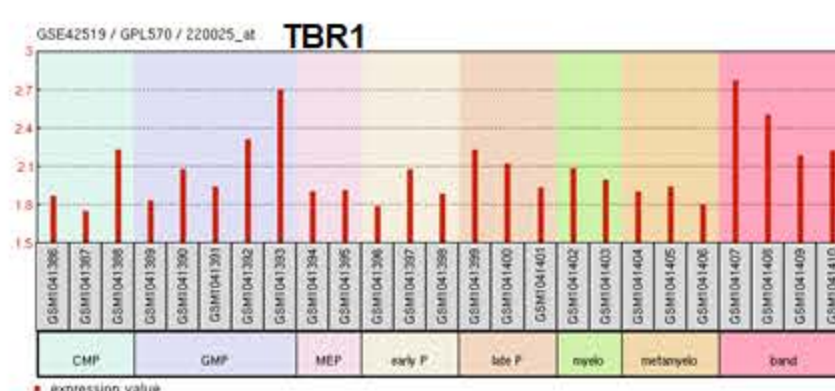

Figure S2: T-box gene activities using dataset GSE42519 for particular stages of myelopoiesis. A cutoff was set at 4.5.



# Erythropoiesis GSE22552

Cutoff: 6.0

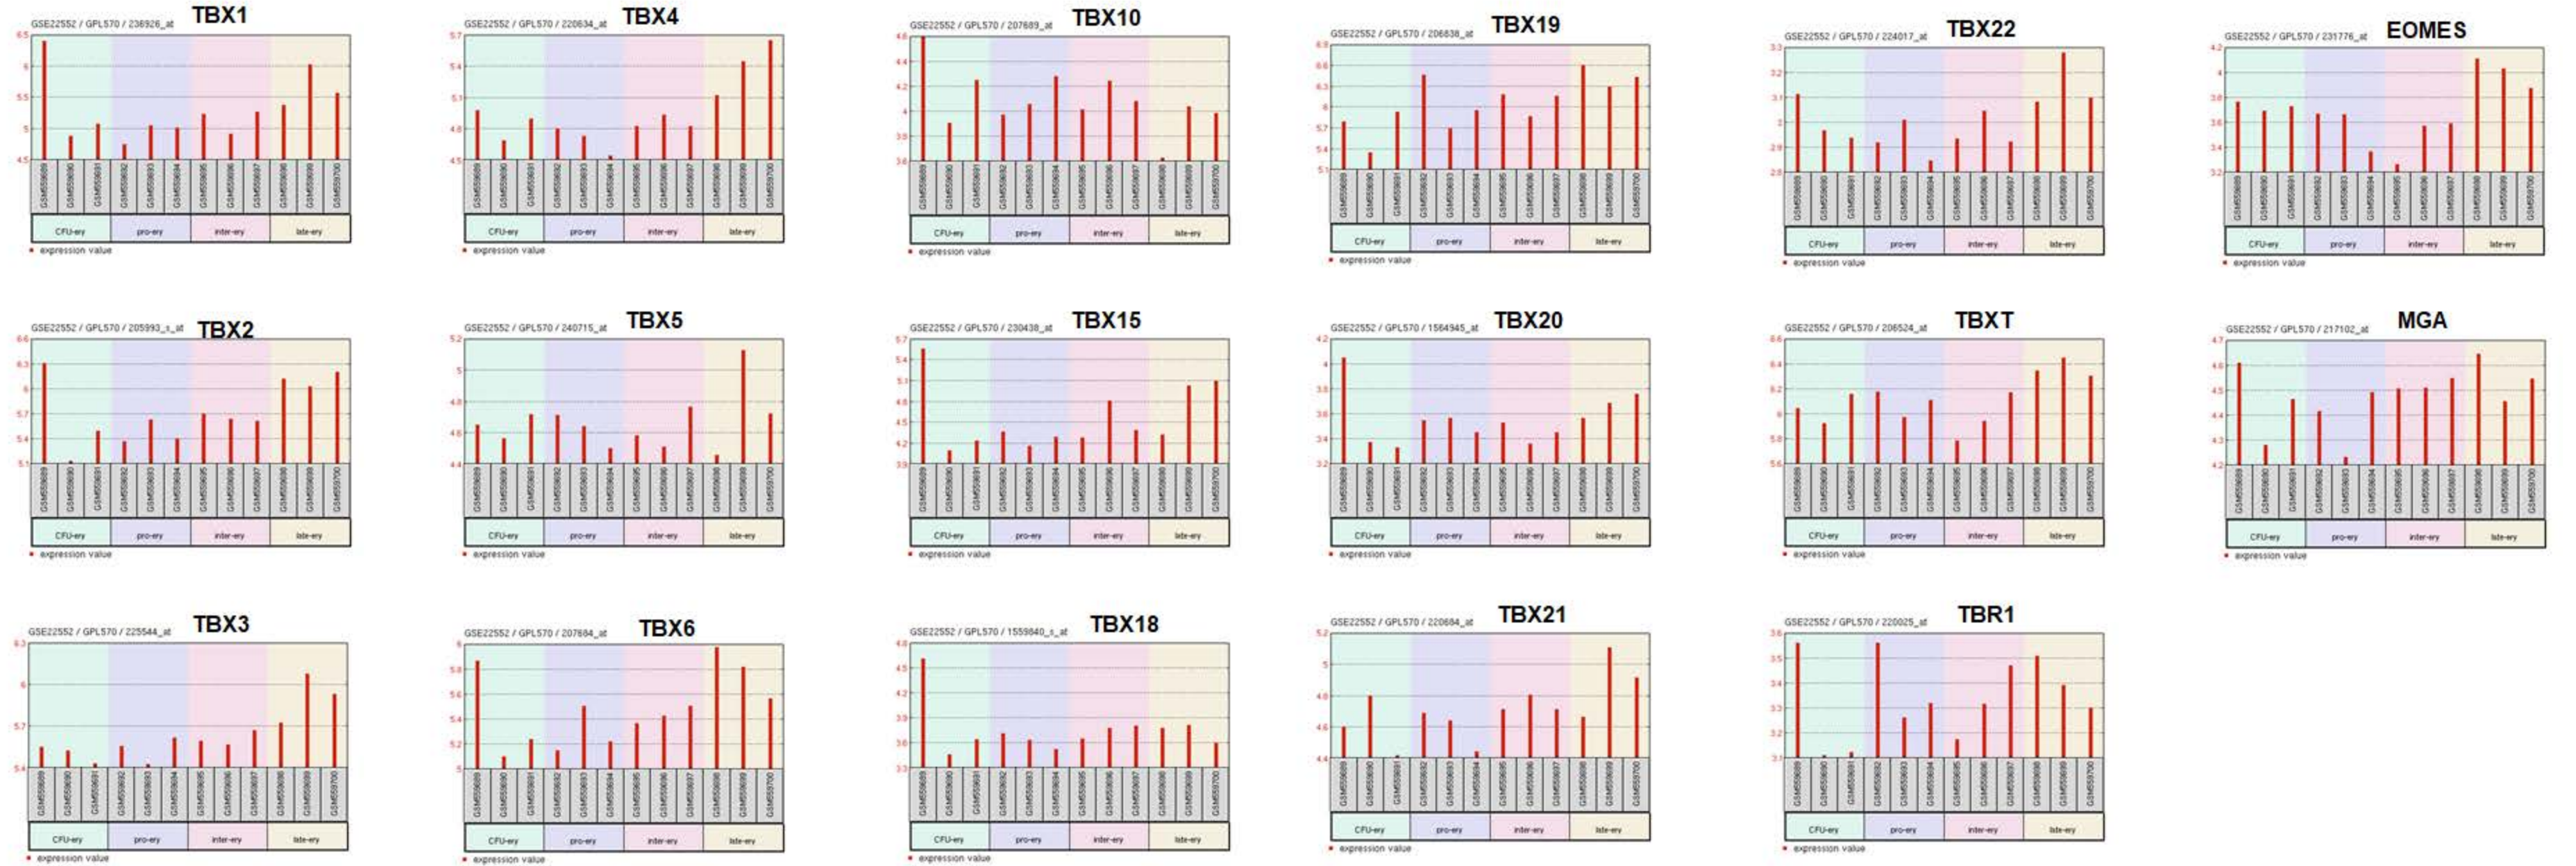

Figure S3: T-box gene activities using dataset GSE22552 for particular stages of erythropoiesis. A cutoff was set at 6.0.



# Megakaryocytes GSE40831

Cutoff: 50

| Group | Accession  | Title                                    | Source name                             | Cell type                                     |
|-------|------------|------------------------------------------|-----------------------------------------|-----------------------------------------------|
| -     | GSM1002641 | megakaryocytes at day0, biological rep A | umbilical cord blood                    | CD34-CD41+CD61+CD45- megakaryocytes           |
| -     | GSM1002642 | megakaryocytes at day0, biological rep B | umbilical cord blood                    | CD34-CD41+CD61+CD45- megakaryocytes           |
| -     | GSM1002643 | megakaryocytes at day4, biological rep A | Lin- cell culture derived samples, day4 | CD34-CD41+CD61+CD45- megakaryocytes           |
| -     | GSM1002644 | megakaryocytes at day4, biological rep B | Lin- cell culture derived samples, day4 | CD34-CD41+CD61+CD45- megakaryocytes           |
| -     | GSM1002645 | CFU-M at day0, biological rep A          | umbilical cord blood                    | CD34-CD33+CD13+ colony forming unit-monocytes |
| -     | GSM1002646 | CFU-M at day0, biological rep B          | umbilical cord blood                    | CD34-CD33+CD13+ colony forming unit-monocytes |
| -     | GSM1002647 | CFU-M at day4, biological rep A          | Lin- cell culture derived samples, day4 | CD34-CD33+CD13+ colony forming unit-monocytes |
| -     | GSM1002648 | CFU-M at day4, biological rep B          | Lin- cell culture derived samples, day4 | CD34-CD33+CD13+ colony forming unit-monocytes |

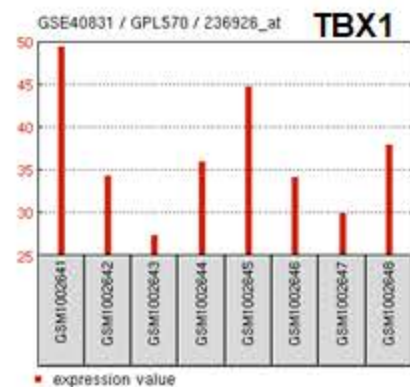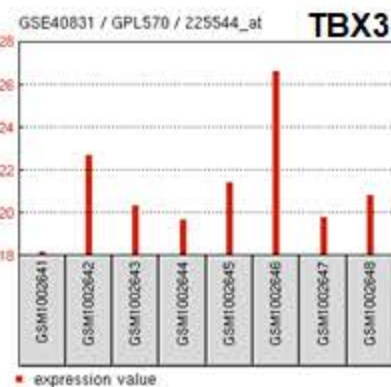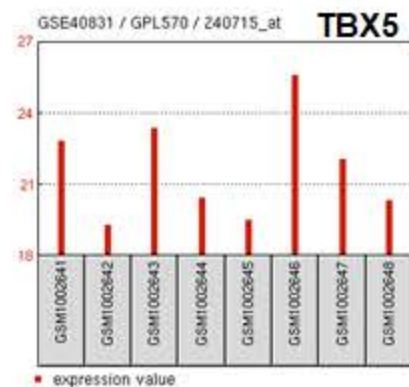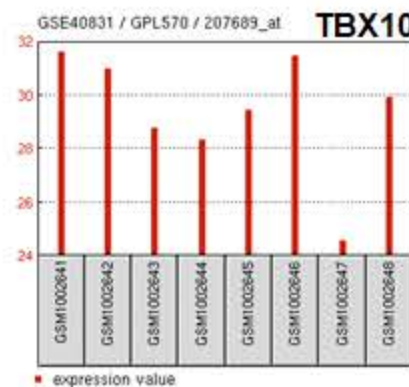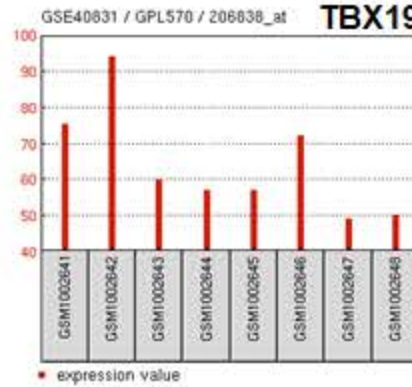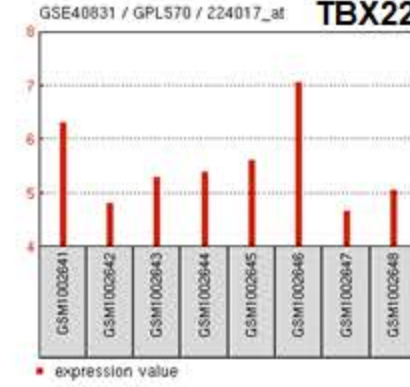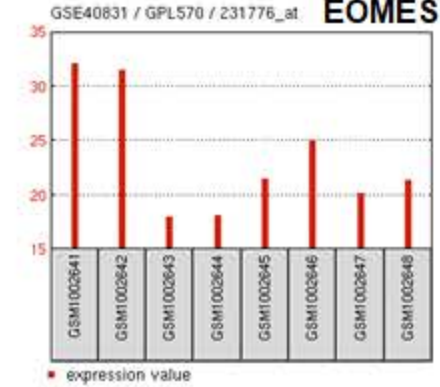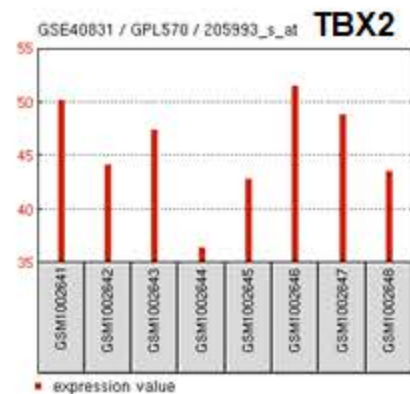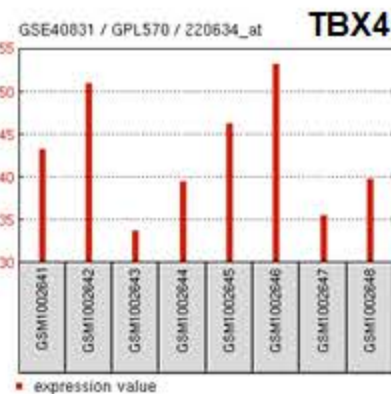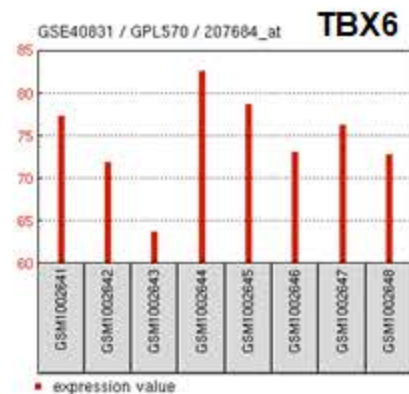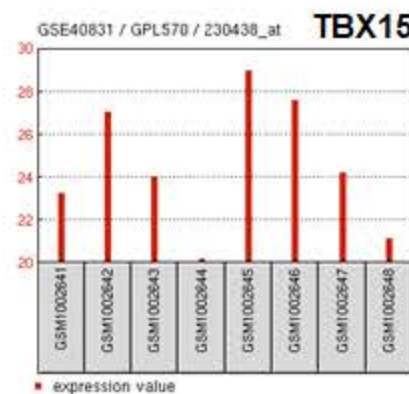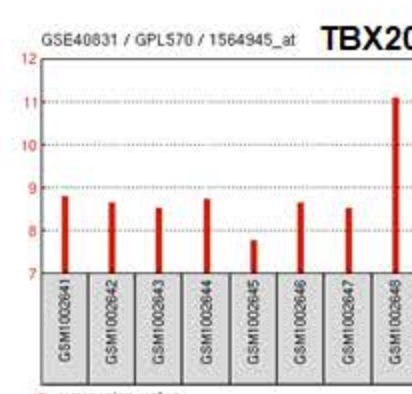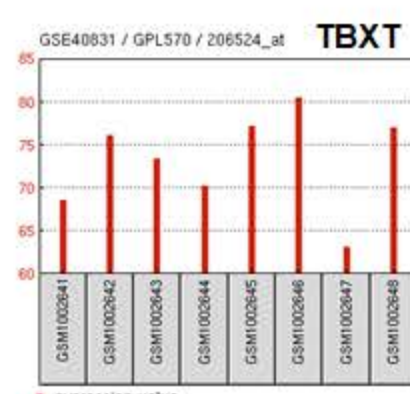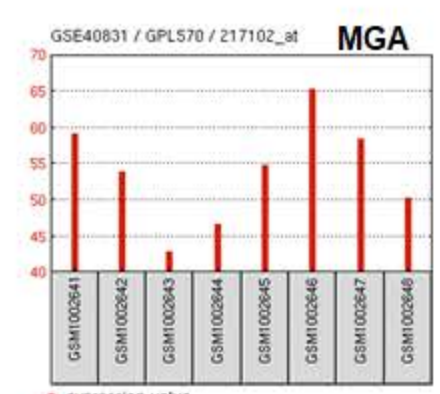

Figure S4: T-box gene activities using dataset GSE40831 for megakaryocytes. A cutoff was set at 50.



Mono, moDC, mast, granulocytes GSE109348

Cutoff: 4.0

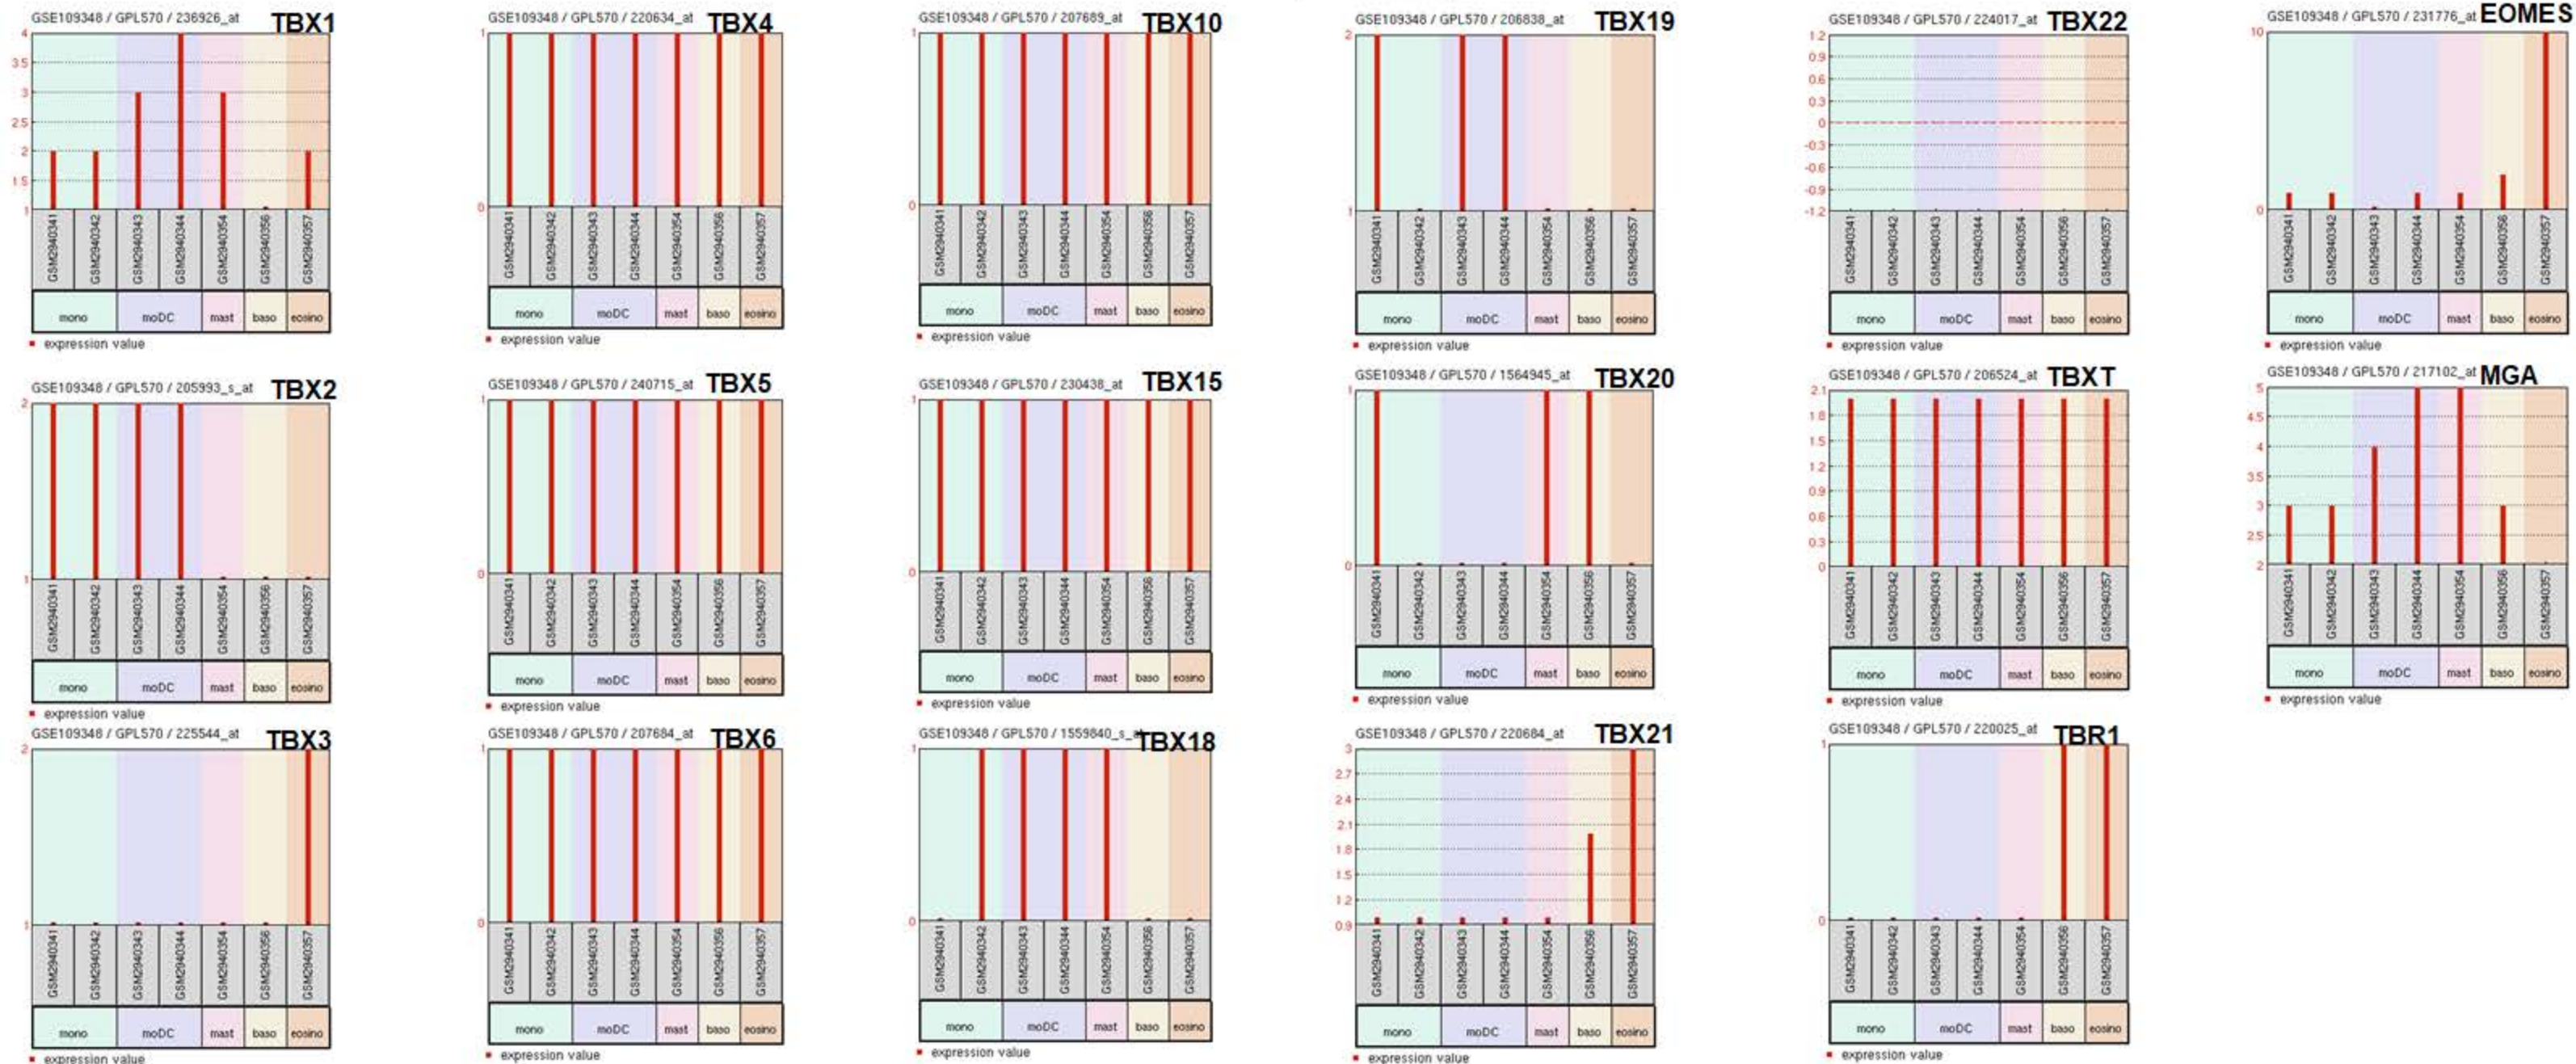

Figure S5: T-box gene activities using dataset GSE109348 for monocytes, monocyte-derived dendritic cells, mast cells and granulocytes. A cutoff was set at 4.0.



AML

Dataset GSE15434 (patients with normal karyotype)

Cutoff: 5.0

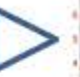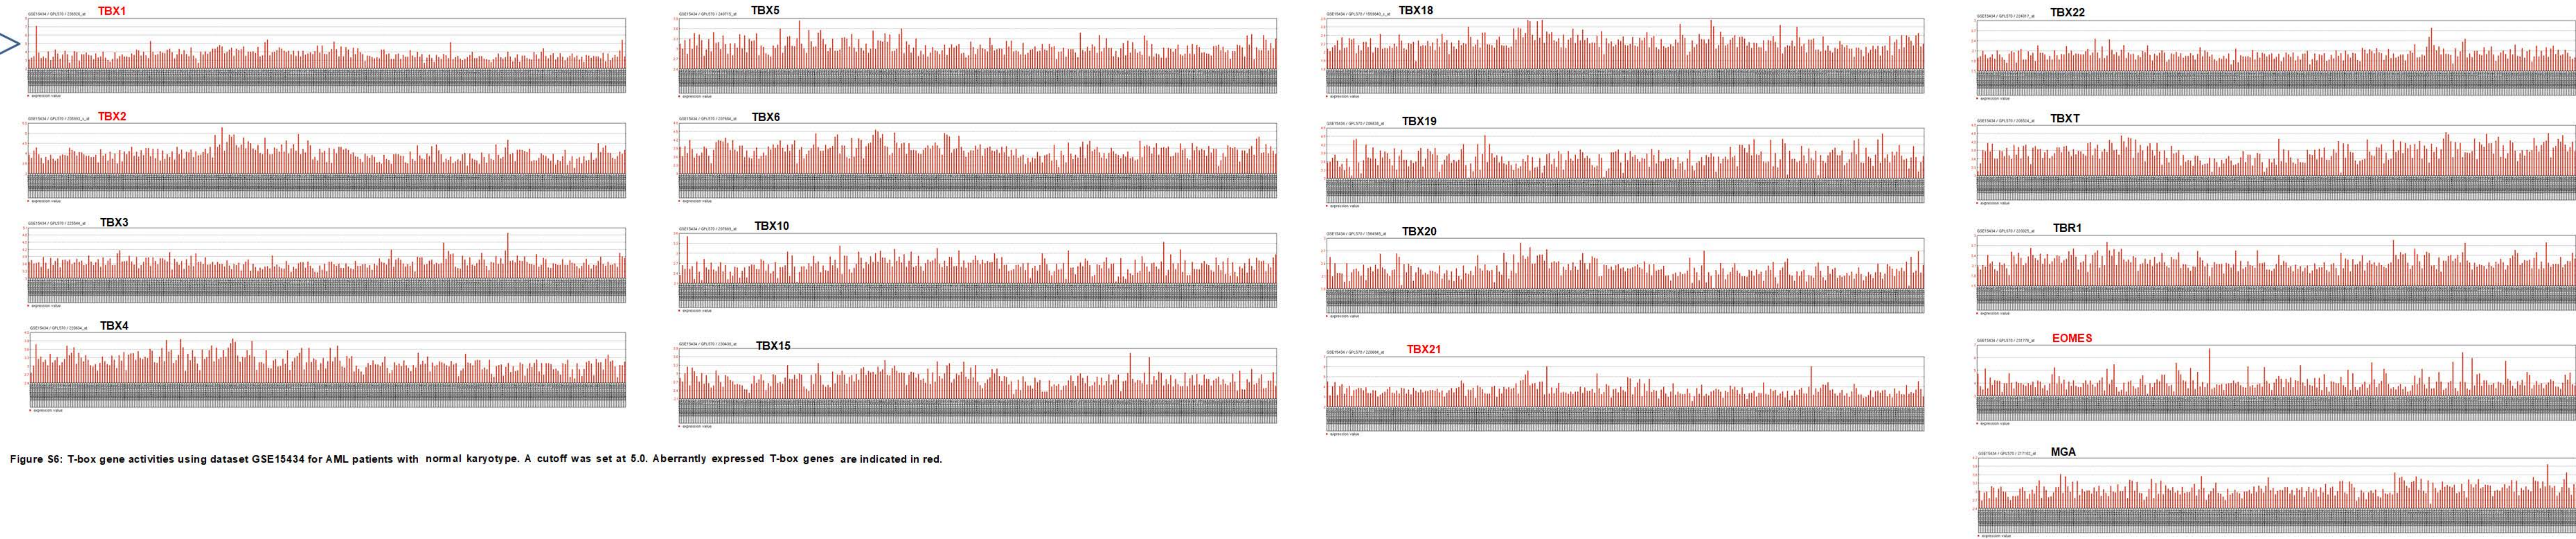

Figure S6: T-box gene activities using dataset GSE15434 for AML patients with normal karyotype. A cutoff was set at 5.0. Aberrantly expressed T-box genes are indicated in red.



AML

Dataset GSE14468 (patients diverse aberrations and mutations)

Cutoff: 6.0

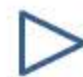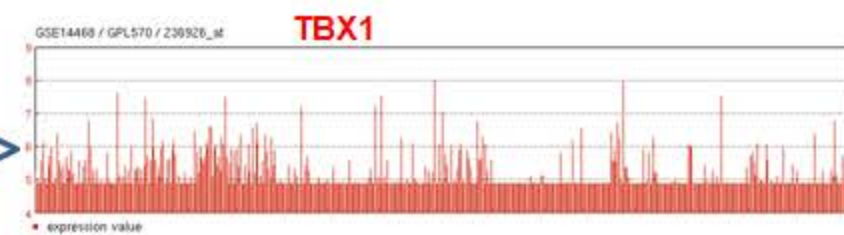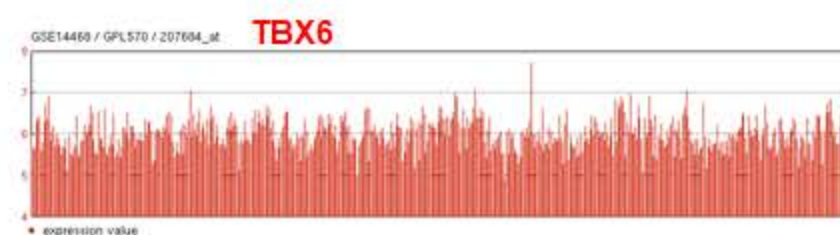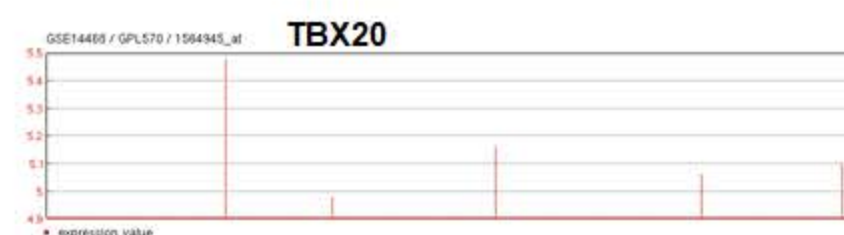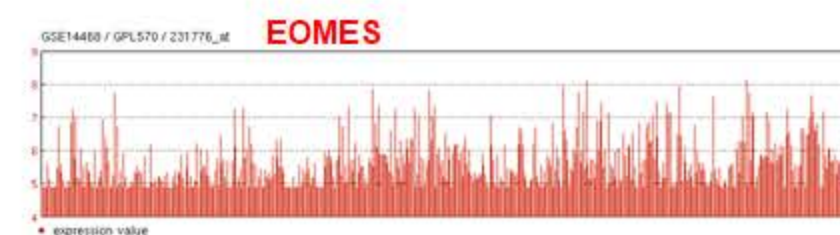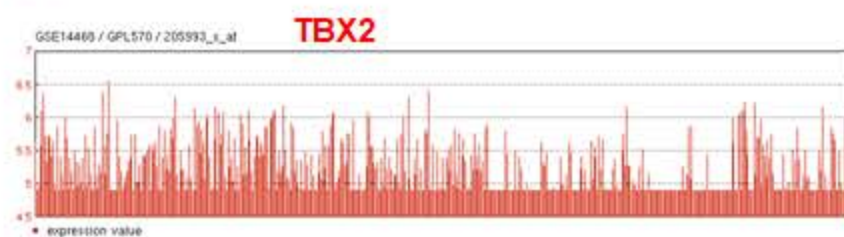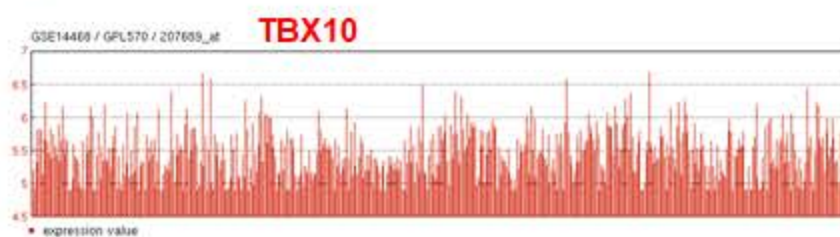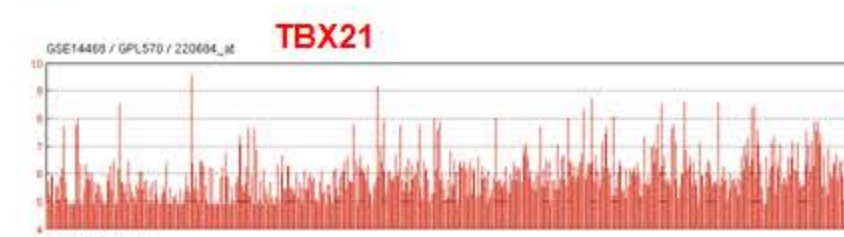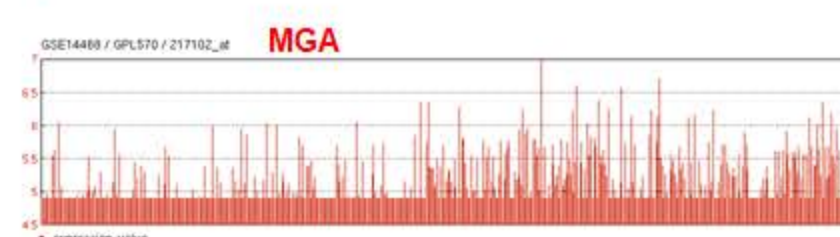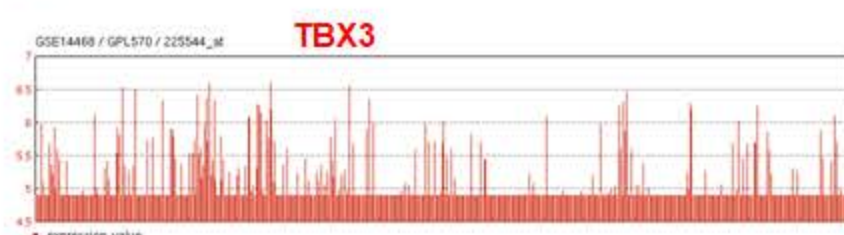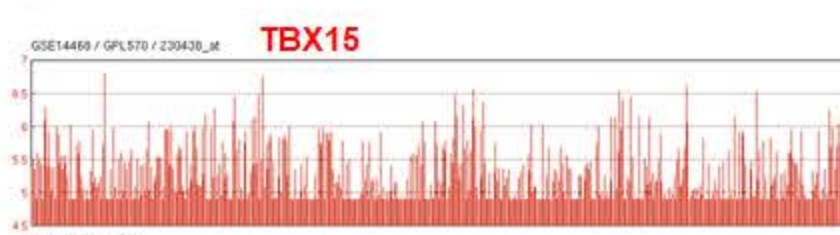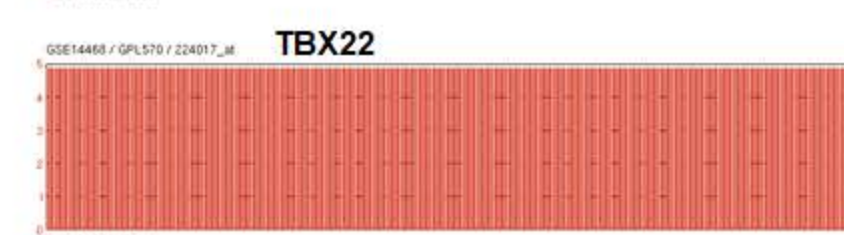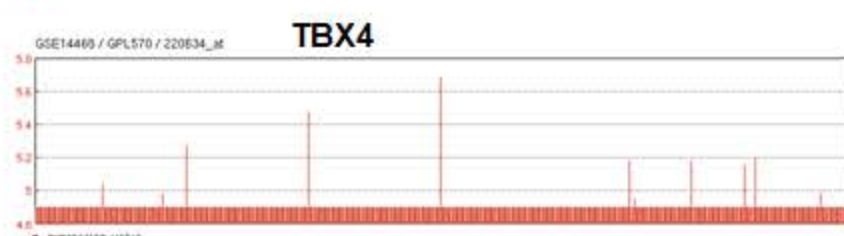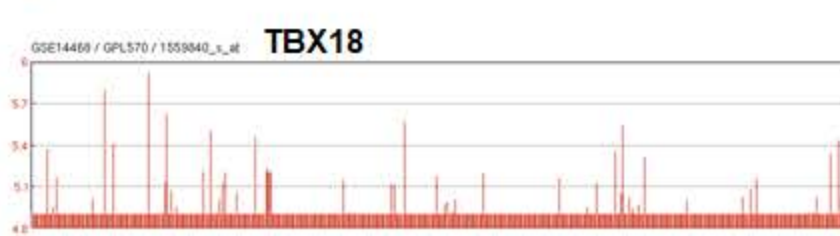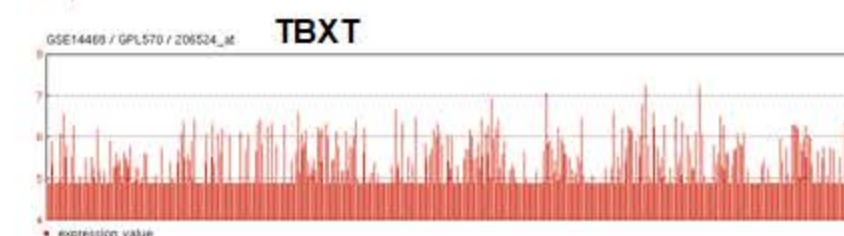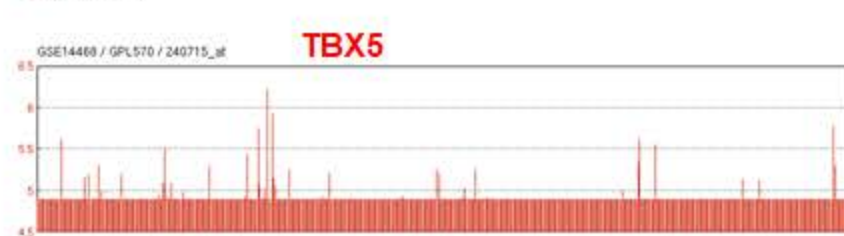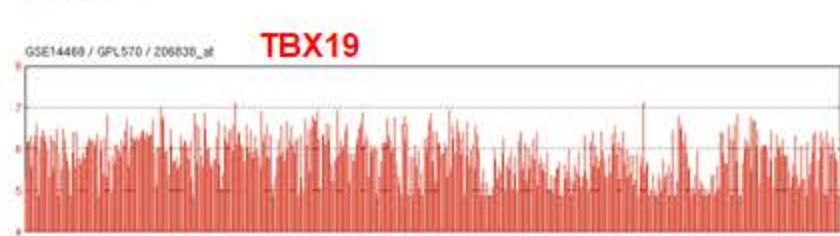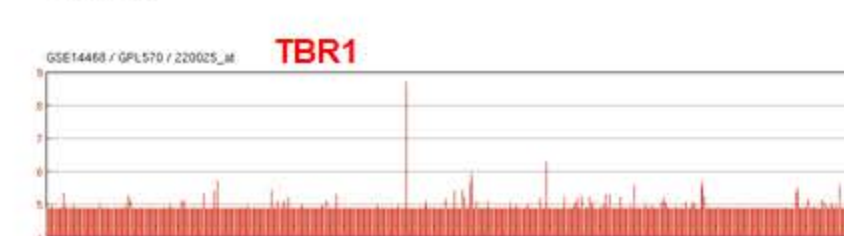

Figure S7: T-box gene activities using dataset GSE14468 for AML patients with diverse aberrations and mutations. A cutoff was set at 6.0. Aberrantly expressed T-box genes are indicated in red.



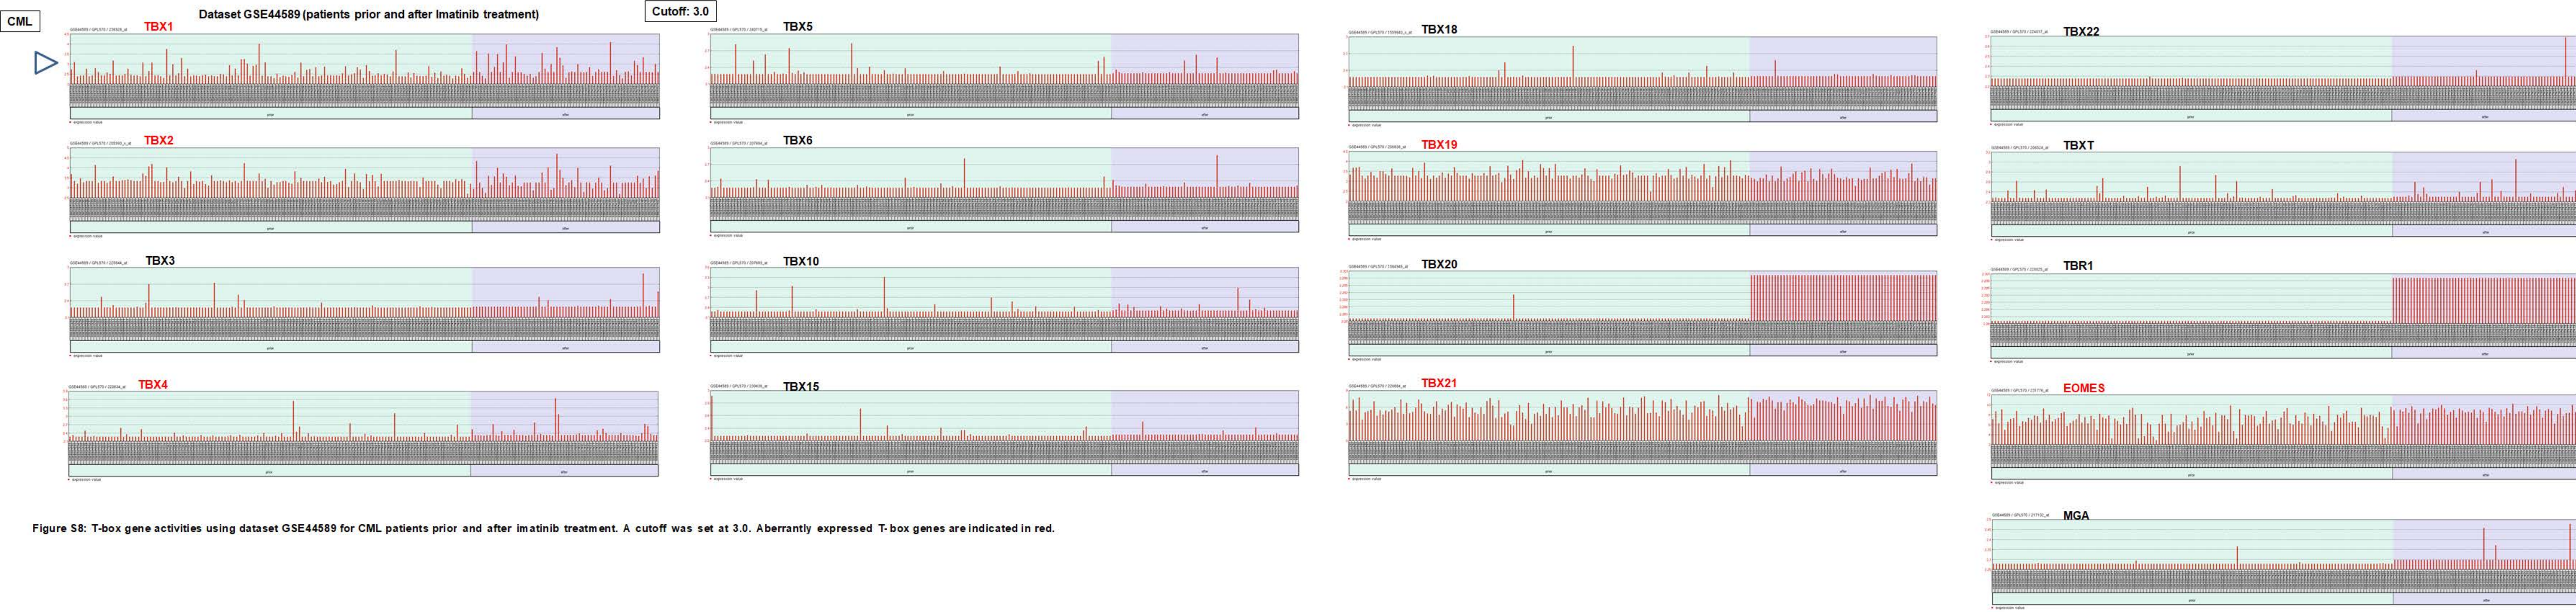



GEOR analysis of **cell line** dataset GSE57083  
comparing K-562 versus CML control cell lines (top-250)

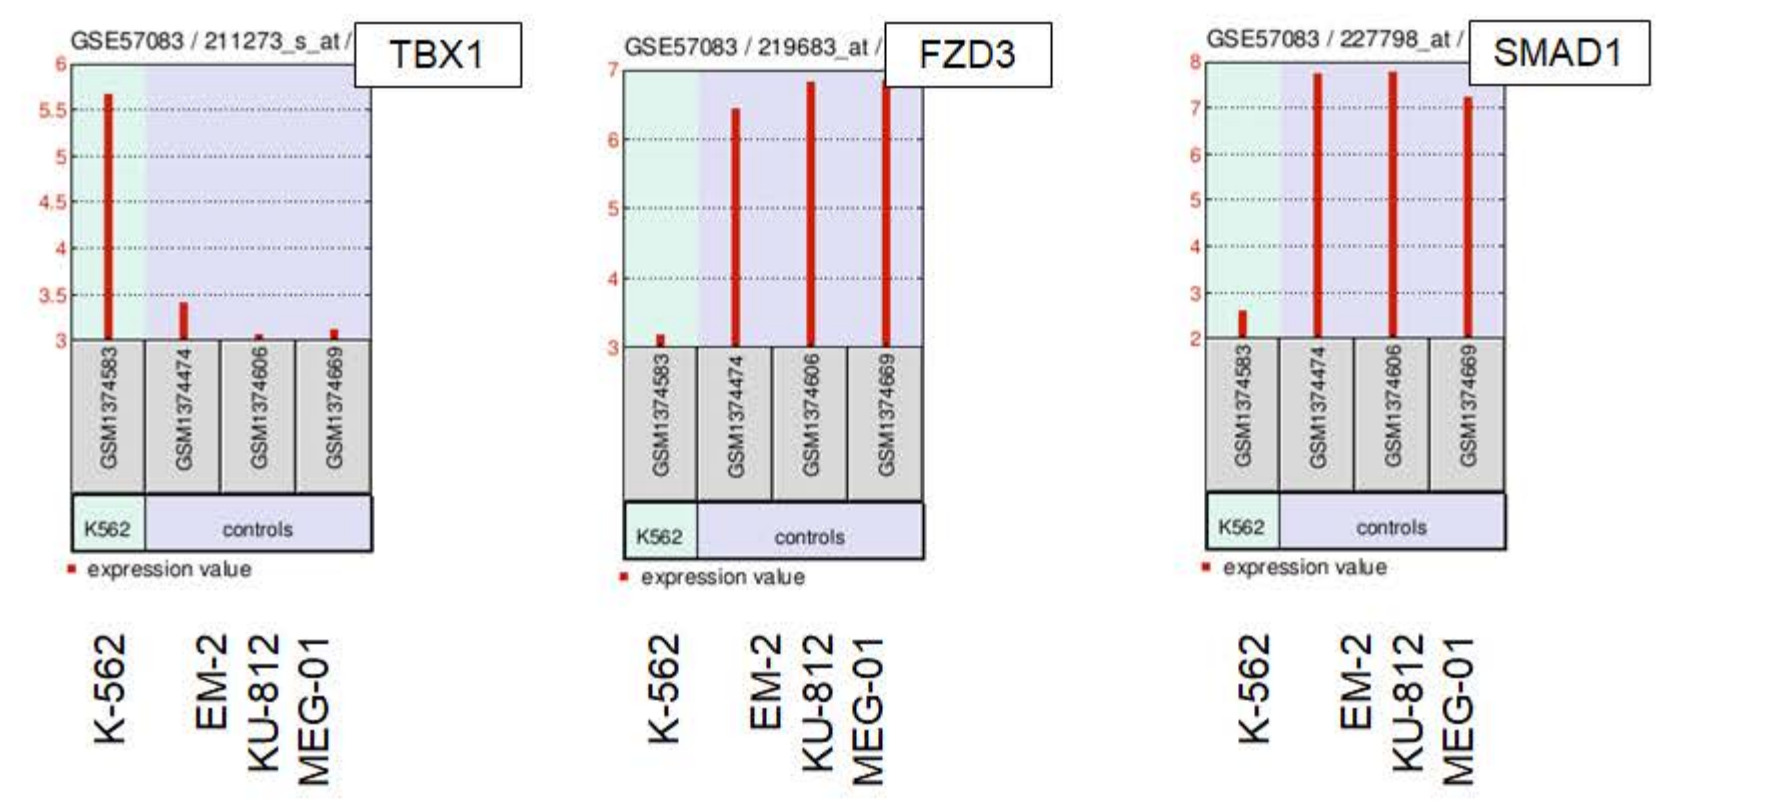



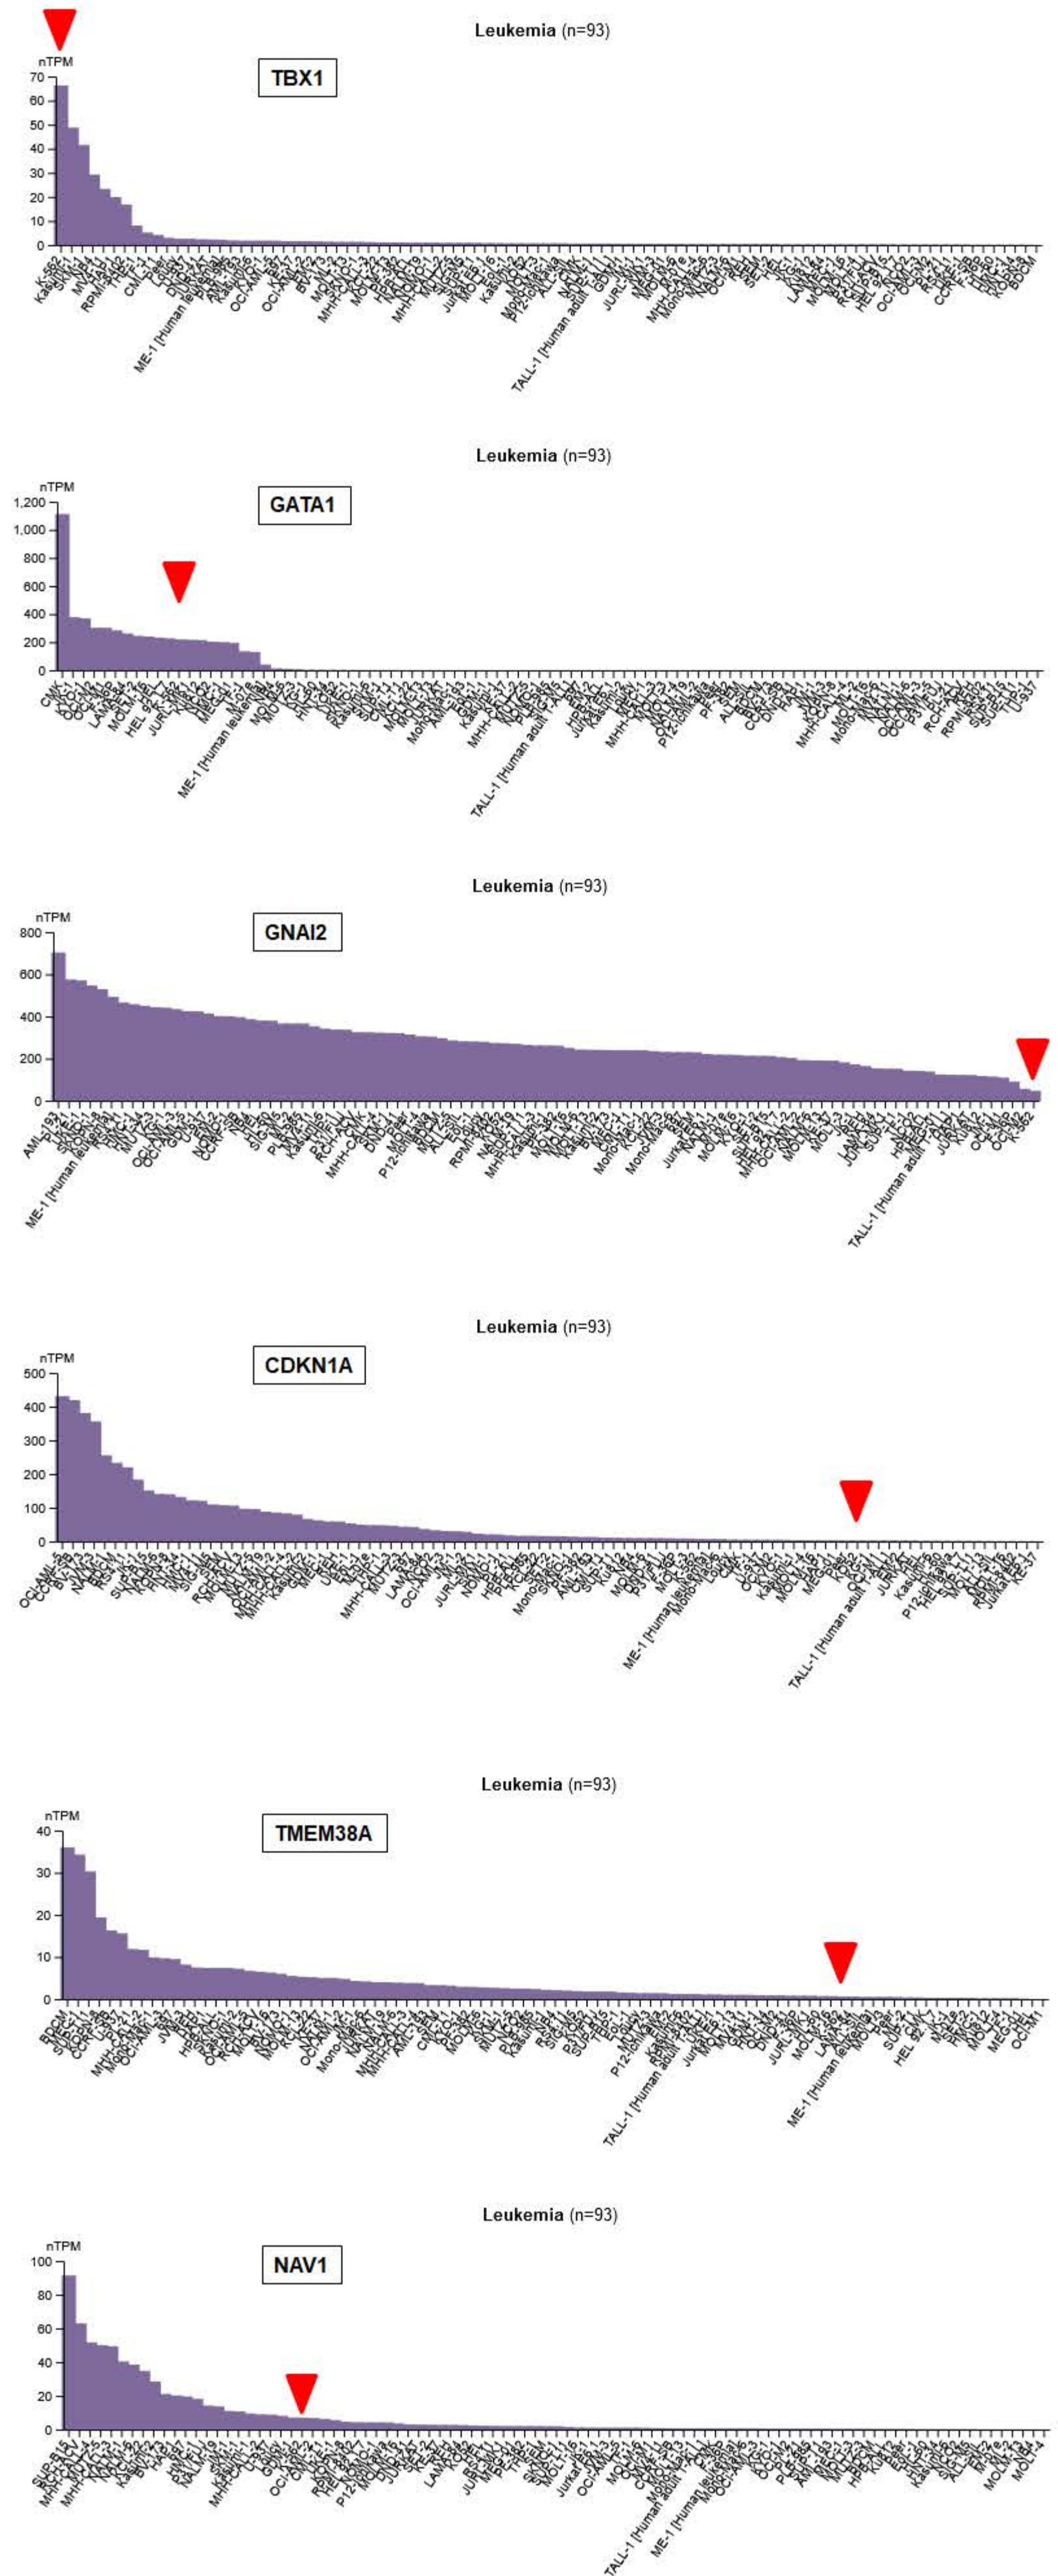

Figure S10: Selected gene activities in 93 leukemia cell lines using RNA-seq data from the Human Protein Atlas for TBX1, GATA1, GNAI2, CDKN1A, TMEM38A and NAV1.



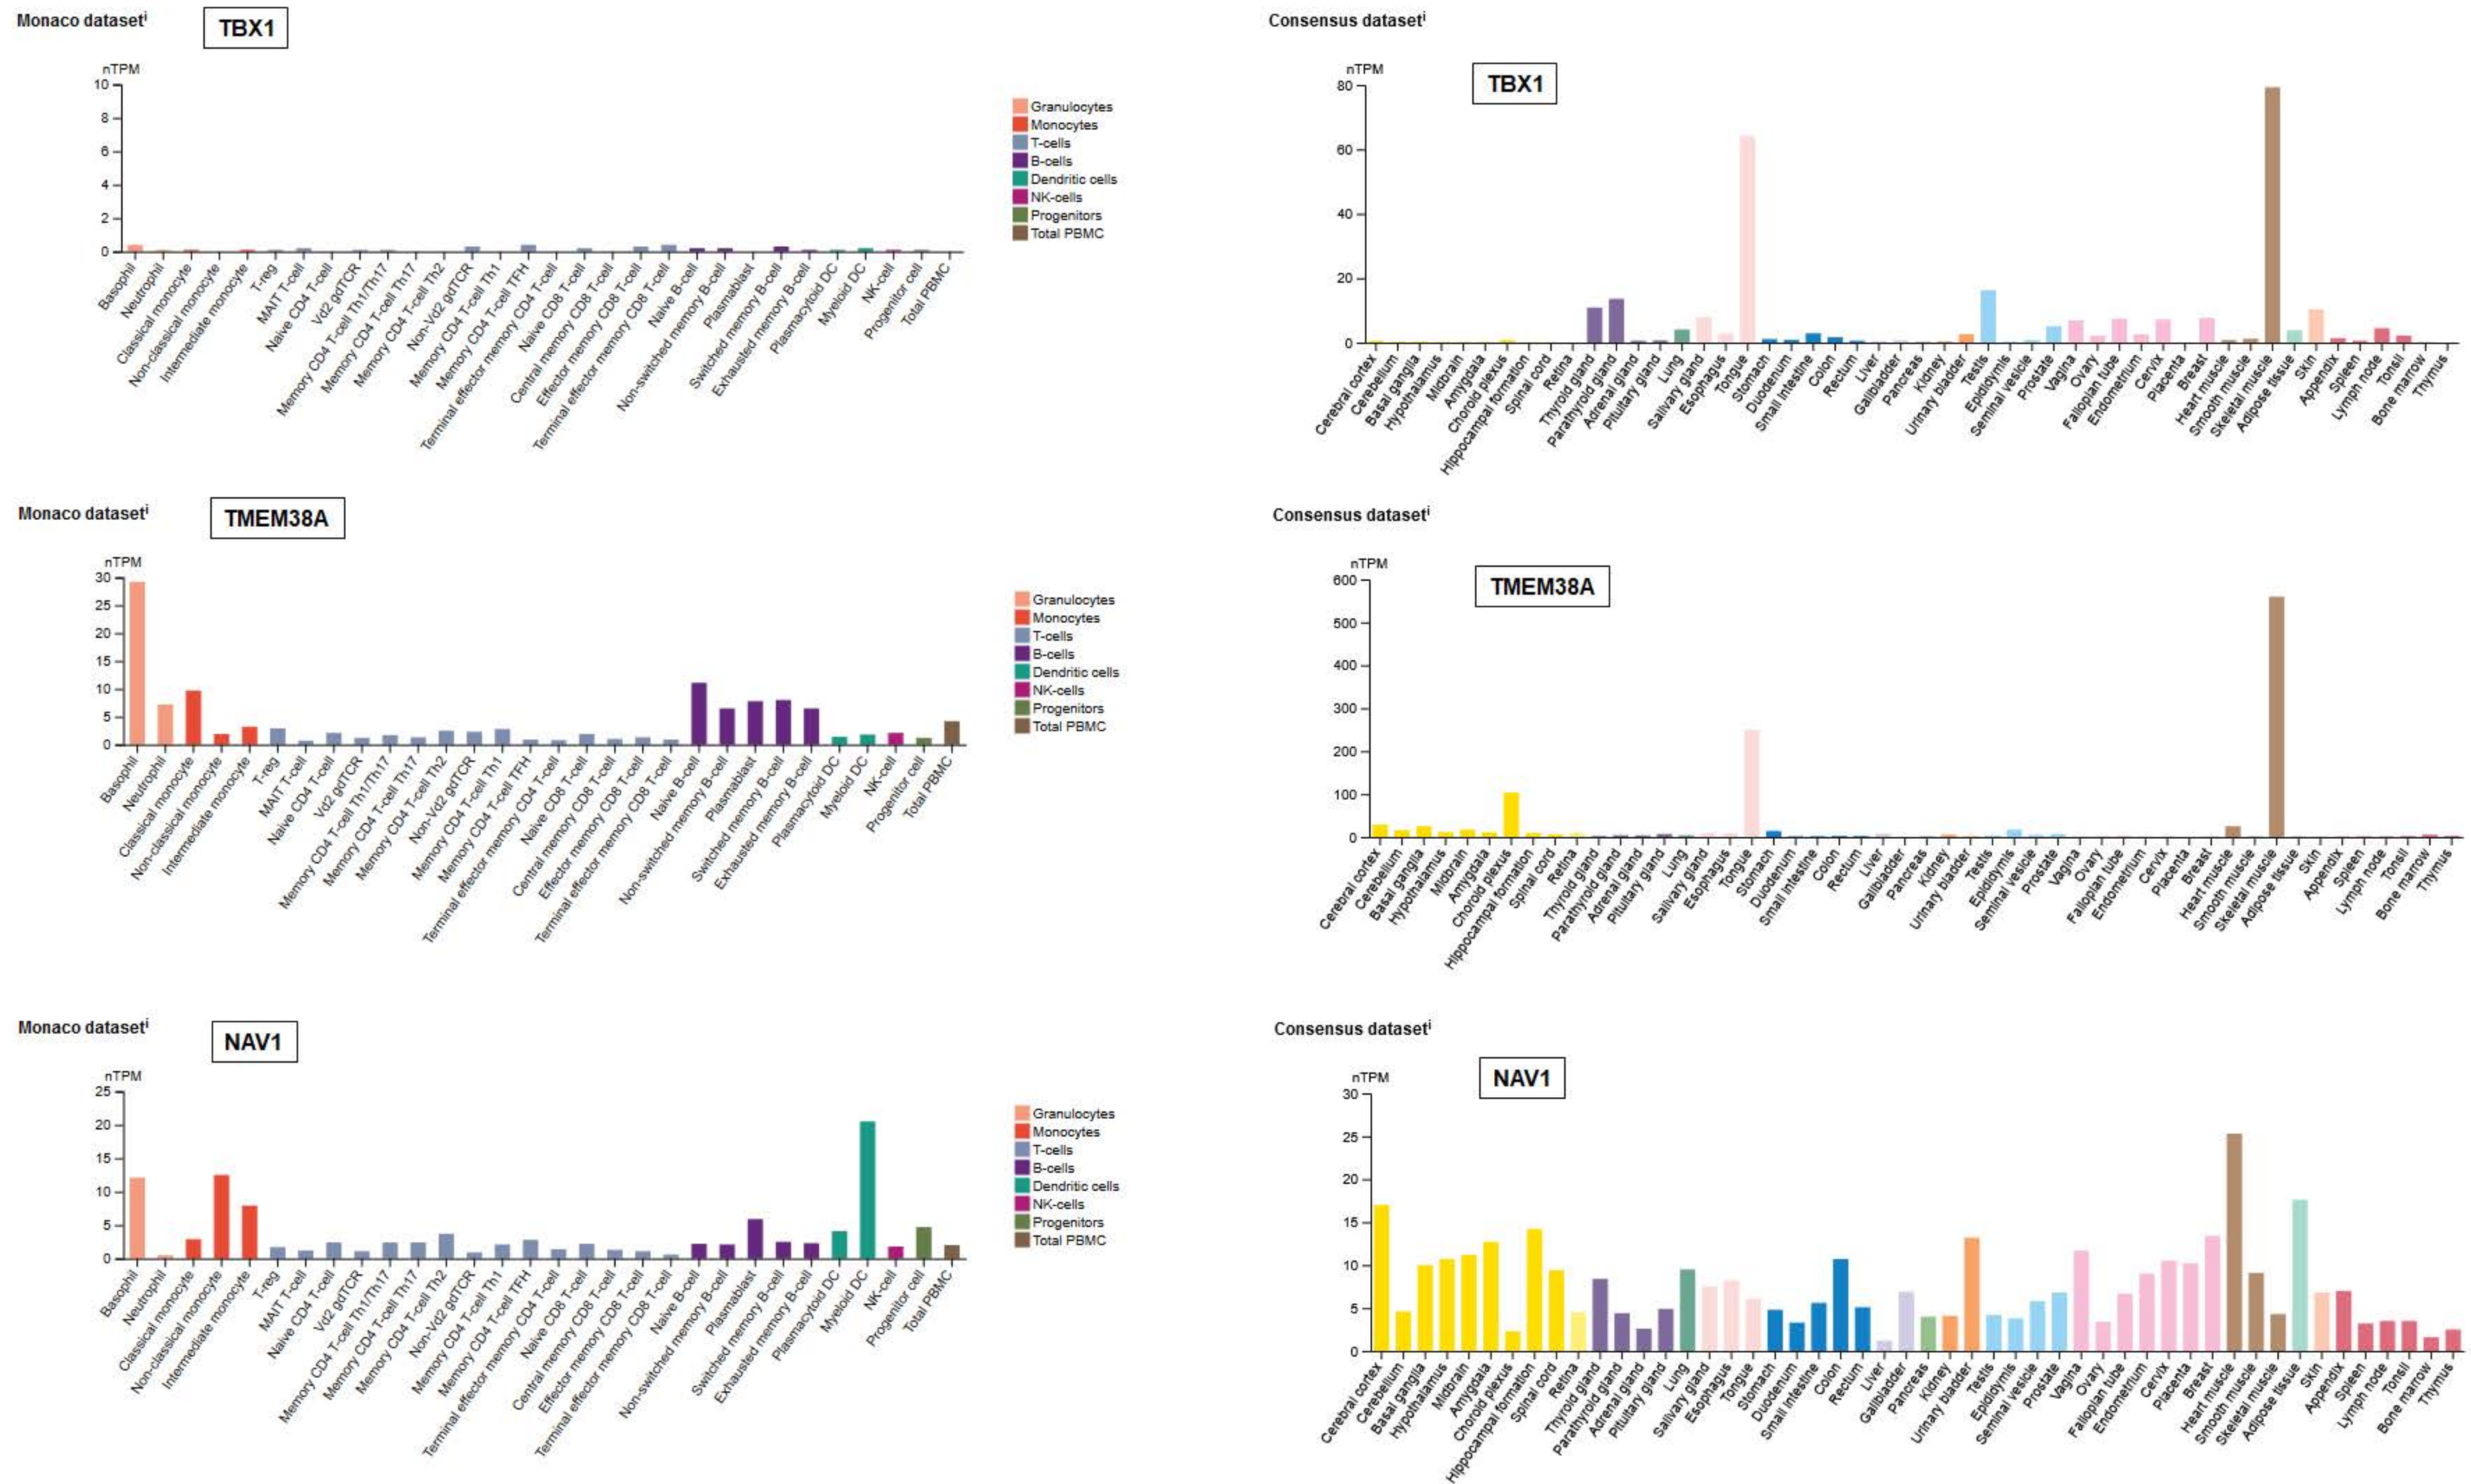

Figure S11: Gene activities for TBX1, TMEM38A and NAV1 using RNA-seq data from the Human Protein Atlas for hematopoietic cell types (Monaco dataset, left) and diverse tissue types (Consensus dataset, right).



| external_gene_name | log2FoldChange | padj     |
|--------------------|----------------|----------|
| AC093525.1         | -6.49          | 9.38E-03 |
| GPR157             | -4.17          | 1.87E-89 |
| AC008763.2         | -3.90          | 9.99E-06 |
| SULT1A4            | -2.50          | 3.40E-05 |
| SPATA17            | -1.77          | 4.71E-02 |
| AP000812.4         | -1.74          | 2.62E-02 |
| ACVR1C             | -1.70          | 3.00E-02 |
| INPP4B             | -1.68          | 4.71E-02 |
| DDX58              | -1.28          | 3.19E-04 |
| SMIM27             | -1.13          | 1.42E-03 |
| TANC2              | -0.99          | 1.38E-02 |
| P2RY11             | -0.90          | 3.88E-02 |
| ESPN               | -0.88          | 2.53E-02 |
| HSPA6              | -0.87          | 4.36E-05 |
| ZNF33B             | -0.86          | 4.32E-02 |
| SAMD11             | -0.82          | 3.87E-03 |
| SYT10              | -0.79          | 3.49E-02 |
| FADS3              | -0.79          | 2.25E-14 |
| LGALS1             | -0.75          | 2.62E-02 |
| HSPE1-MOB4         | -0.72          | 2.57E-02 |
| TBX1               | -0.63          | 2.48E-10 |
| CYRIA              | -0.61          | 2.10E-03 |
| PLAT               | 0.61           | 2.65E-02 |
| GGT1               | 0.62           | 1.58E-02 |
| GIPC3              | 0.63           | 8.99E-03 |
| NAV1               | 0.68           | 1.43E-03 |
| AL157935.2         | 0.92           | 1.78E-02 |
| FAM114A1           | 0.97           | 1.17E-02 |
| HERC3              | 1.21           | 5.17E-04 |
| NOTCH3             | 1.95           | 3.40E-05 |
| CAPN11             | 2.04           | 4.84E-02 |
| TMEM38A            | 2.62           | 1.06E-07 |
| DMBT1              | 3.48           | 3.72E-03 |
| ZNF385B            | 5.44           | 4.71E-02 |

**Table S1: List of potential TBX1 target genes. These genes were statistically significant differentially expressed in K-562 cells treated for TBX1-knockdown (performed in triplicate). Indicated are log2-fold change and the according p-value. The genes TBX1, TMEM38A and NAV1 are highlighted.**
